# Supplementary material for: Vitamin D status and its relationship with systemic lupus erythematosus as a determinant and outcome of disease activity
Source: publisher site journal article supplement (doi:10.1515/hmbci-2018-0064), 2019-04-03
Supplement: Supplementary file 5 [file Supplementary table 3.docx]

Supplementary table 3. Relationship of 25-OH-D levels with clinical profile.

| **Clinical profile** |  | **Serum 25-OH-D levels** |  | ***P* value** |
| --- | --- | --- | --- | --- |
| Musculoskeletal |  |  |  |  |
| *Yes* |  | 19.04 ± 8.13 |  | 0.31 |
| *No* |  | 20.94 ± 10.28 |  |  |
| Nephritis |  |  |  |  |
| *Yes* |  | 19.52 ± 9.05 |  | 0.15 |
| *No* |  | 22.79 ± 10.91 |  |  |
| Vasculitis |  |  |  |  |
| *Yes* |  | 19.25 ± 7.15 |  | 0.75 |
| *No* |  | 20.27 ± 9.69 |  |  |
| Serositis |  |  |  |  |
| *Yes* |  | 17.55 ± 6.66 |  | 0.15 |
| *No* |  | 20.86 ± 10.01 |  |  |
| Mucocutaneous |  |  |  |  |
| *Yes* |  | 19.51 ± 8.93 |  | 0.21 |
| *No* |  | 22.07 ± 10.85 |  |  |
| Constitutional |  |  |  |  |
| *Yes* |  | 19.94 ± 2.74 |  | 0.62 |
| *No* |  | 21.02 ± 8.74 |  |  |
| Haematological |  |  |  |  |
| *Yes* |  | 19.97 ± 9.32 |  | 0.79 |
| *No* |  | 20.45 ± 9.79 |  |  |
| CNS manifestations |  |  |  |  |
| *Yes* |  | 19.99 ± 12 |  | 0.95 |
| *No* |  | 20.21 ± 9.28 |  |  |

*Abbreviations*: CNS, central nervous system; 25-OH-D, 25-hydroxyvitamin D.

The values are expressed as mean ± standard deviation.
