# Supplementary material for: Vitamin D status and its relationship with systemic lupus erythematosus as a determinant and outcome of disease activity
Source: publisher site journal article supplement (doi:10.1515/hmbci-2018-0064), 2019-04-03
Supplement: Supplementary file 7 [file Supplementary table 4.docx]

Supplementary table 4. Comparison of 25-OH-D levels across disease activity (SLEDAI score) categories.

| **Disease activity (SLEDAI) category** |  | **No. of patients** | **25-OH-D levels** | **Statistic** |
| --- | --- | --- | --- | --- |
| No activity (SLEDAI = 0) |  | 8 | 24.8 (12.8 - 68) | (KW statistic  = 10.6),  *P* < 0.05 |
| Mild activity (SLEDAI = 1 - 5) |  | 16 | 21.6 (11.2 - 50) |
| Moderate activity (SLEDAI = 6 - 10) |  | 23 | 21.3 (8 - 50) |
| High activity (SLEDAI = 11 - 19) |  | 37 | 17.6 (8 - 31) |
| Very high activity (SLEDAI ≥ 20) |  | 25 | 17.5 (8.2 - 31.7) |

*Abbreviations*: SLEDAI, systemic lupus erythematosus disease activity index; 25-OH-D, 25-hydroxyvitamin D; KW statistic, Kruskal-Wallis statistic.

The 25-OH-D values are expressed as median (minimum value – maximum value).
